# Supplementary material
Source: PubMed Central journal article supplement (PMC3158278)
Supplement: NIHMS303100-supplement-2.pdf [file NIHMS303100-supplement-2.pdf]

Supplementary Table 2

| Pathway      | Gene         | Ordinal Genetic Model |                                          |               | Dominant Genetic Model                   |               | Recessive Genetic Model                  |               |
|--------------|--------------|-----------------------|------------------------------------------|---------------|------------------------------------------|---------------|------------------------------------------|---------------|
|              |              | Number of SNPs Tested | Number of Principal Components Extracted | p-value       | Number of Principal Components Extracted | p-value       | Number of Principal Components Extracted | p-value       |
| GSH          | <b>GSTM5</b> | 4                     | 2                                        | 0.0911        | 2                                        | 0.7577        | 2                                        | <b>0.0022</b> |
| GSH          | <b>GSTA5</b> | 5                     | 2                                        | 0.0679        | 3                                        | <b>0.0188</b> | 2                                        | 0.0779        |
| GSH          | <b>GCLC</b>  | 13                    | 4                                        | 0.1190        | 5                                        | <b>0.0207</b> | 4                                        | 0.7152        |
| GSH          | <b>GSTM3</b> | 3                     | 2                                        | 0.3388        | 2                                        | 0.3208        | 2                                        | <b>0.0216</b> |
| Inflammation | <b>PTGS2</b> | 7                     | 3                                        | <b>0.0211</b> | 4                                        | 0.1082        | 3                                        | 0.3929        |
| GSH          | <b>ABCC4</b> | 63                    | 14                                       | 0.2818        | 20                                       | <b>0.0146</b> | 20                                       | 0.9484        |
| GSH          | <b>GSTA1</b> | 2                     | 1                                        | 0.0598        | 1                                        | 0.2958        | 1                                        | <b>0.0372</b> |
| GSH          | <b>GSTA2</b> | 2                     | 1                                        | <b>0.0434</b> | 2                                        | 0.0727        | 1                                        | 0.0618        |
| GSH          | <i>GSTZ1</i> | 9                     | 4                                        | 0.0725        | 5                                        | 0.0706        | 3                                        | 0.6373        |
| Inflammation | <i>IL10</i>  | 7                     | 3                                        | 0.0928        | 4                                        | 0.0517        | 3                                        | 0.5225        |
| DNA          | APEX1        | 2                     | 1                                        | 0.8288        | 2                                        | 0.0839        | 1                                        | 0.7989        |
| DNA          | MLH1         | 2                     | 1                                        | 0.8251        | 1                                        | 0.3459        | 1                                        | 0.0704        |
| DNA          | OGG1         | 3                     | 2                                        | 0.1275        | 2                                        | 0.1843        | 2                                        | 0.0686        |
| DNA          | MSH3         | 15                    | 3                                        | 0.2178        | 4                                        | 0.4000        | 5                                        | 0.1205        |
| GSH          | GSTP1        | 5                     | 2                                        | 0.0834        | 2                                        | 0.1546        | 2                                        | 0.2035        |
| DNA          | RAD51        | 2                     | 2                                        | 0.2314        | 2                                        | 0.3409        | 2                                        | 0.0937        |
| DNA          | MSH2         | 6                     | 3                                        | 0.1469        | 3                                        | 0.3213        | 2                                        | 0.4303        |
| GSH          | GPX2         | 3                     | 1                                        | 0.0962        | 2                                        | 0.1325        | 1                                        | 0.4979        |
| GSH          | GCLM         | 3                     | 2                                        | 0.4323        | 2                                        | 0.3899        | 2                                        | 0.1432        |
| Inflammation | IL1RN        | 6                     | 3                                        | 0.0908        | 3                                        | 0.0807        | 2                                        | 0.1304        |
| GSH          | GSTA4        | 8                     | 4                                        | 0.2096        | 4                                        | 0.1691        | 2                                        | 0.0958        |
| GSH          | ABCC3        | 14                    | 6                                        | 0.1762        | 7                                        | 0.2472        | 7                                        | 0.6833        |
| Inflammation | TNF          | 6                     | 3                                        | 0.9077        | 3                                        | 0.9611        | 2                                        | 0.1121        |
| DNA          | RAD52        | 10                    | 3                                        | 0.3330        | 4                                        | 0.1441        | 4                                        | 0.9050        |
| DNA          | PARP         | 12                    | 3                                        | 0.1685        | 4                                        | 0.1259        | 4                                        | 0.1616        |
| GSH          | GSS          | 7                     | 3                                        | 0.6433        | 4                                        | 0.7673        | 3                                        | 0.3614        |
| GSH          | ABCC1        | 28                    | 9                                        | 0.3546        | 11                                       | 0.4773        | 10                                       | 0.6715        |
| GSH          | GSTM4        | 4                     | 2                                        | 0.9839        | 3                                        | 0.6848        | 2                                        | 0.2704        |
| DNA          | MSH6         | 9                     | 3                                        | 0.2378        | 4                                        | 0.2884        | 4                                        | 0.8602        |
| DNA          | ERCC2        | 7                     | 3                                        | 0.3957        | 4                                        | 0.4340        | 4                                        | 0.3390        |
| GSH          | GSTO1        | 5                     | 2                                        | 0.4120        | 2                                        | 0.4189        | 1                                        | 0.5427        |

|              |       |    |    |        |    |        |    |        |
|--------------|-------|----|----|--------|----|--------|----|--------|
| DNA          | MGMT  | 38 | 11 | 0.2978 | 15 | 0.7216 | 15 | 0.3138 |
| GSH          | GSR   | 6  | 3  | 0.3499 | 3  | 0.3583 | 3  | 0.3599 |
| GSH          | GSTA3 | 5  | 2  | 0.2875 | 2  | 0.2803 | 1  | 0.5620 |
| DNA          | RAD50 | 3  | 2  | 0.4135 | 2  | 0.3461 | 3  | 0.9548 |
| GSH          | GSTO2 | 6  | 1  | 0.6207 | 2  | 0.5205 | 1  | 0.5534 |
| Inflammation | IL8   | 2  | 1  | 0.4213 | 1  | 0.5951 | 1  | 0.4260 |
| DNA          | XRCC1 | 5  | 2  | 0.6852 | 3  | 0.7700 | 2  | 0.8735 |
| GSH          | GPX3  | 6  | 2  | 0.4587 | 3  | 0.4912 | 2  | 0.3172 |
| DNA          | XPC   | 6  | 2  | 0.4854 | 3  | 0.4007 | 3  | 0.6803 |
| Inflammation | LTA   | 4  | 2  | 0.8628 | 2  | 0.9968 | 2  | 0.5818 |
| GSH          | ABCC2 | 11 | 3  | 0.8628 | 5  | 0.7349 | 3  | 0.8354 |
| DNA          | LIG1  | 5  | 2  | 0.6195 | 2  | 0.4088 | 2  | 0.6560 |
| Inflammation | IL1B  | 5  | 3  | 0.9062 | 3  | 0.9315 | 3  | 0.6336 |
| DNA          | XPA   | 5  | 3  | 0.7207 | 3  | 0.4996 | 2  | 0.6823 |
| DNA          | RRM1  | 6  | 2  | 0.7137 | 3  | 0.8098 | 2  | 0.6825 |
| DNA          | ERCC1 | 5  | 2  | 0.8128 | 2  | 0.7323 | 2  | 0.9266 |
| GSH          | GPX5  | 3  | 2  | 0.8356 | 2  | 0.7344 | 2  | 0.9599 |
| Inflammation | IL6   | 7  | 3  | 0.9810 | 4  | 0.9866 | 2  | 0.7623 |
| GSH          | GPX6  | 3  | 2  | 0.9196 | 2  | 0.7967 | 2  | 0.9599 |
| GSH          | GPX7  | 2  | 1  | 0.8390 | 2  | 0.7976 | 1  | 0.6392 |
