# Supplementary material
Source: PubMed Central journal article supplement (PMC3158278)
Supplement: NIHMS303100-supplement-5.pdf [file NIHMS303100-supplement-5.pdf]

477 **Supplementary Tables:**

478 **Supplementary Table 1.** All genotyped and tested SNPs from the genes in the glutathione,  
479 DNA repair, and inflammation response pathways, along with their associations with overall  
480 survival in low stage NSCLC.

481 **Supplementary Table 2.** Genes tested with multi-SNP tests of association, and the results of  
482 these tests.

484

485

486 **Supplementary Figures:**

487 **Supplementary Figure 1.** Kaplan-Meier survival curves by 9 combinations of the top two SNP  
488 genotypes.

489

490 **Supplementary Figure 2.** Kaplan-Meier survival curves by composite risk scores derived from  
491 the top two SNP genotypes.
