# Supplementary material
Source: PubMed Central journal article supplement (PMC3158278)

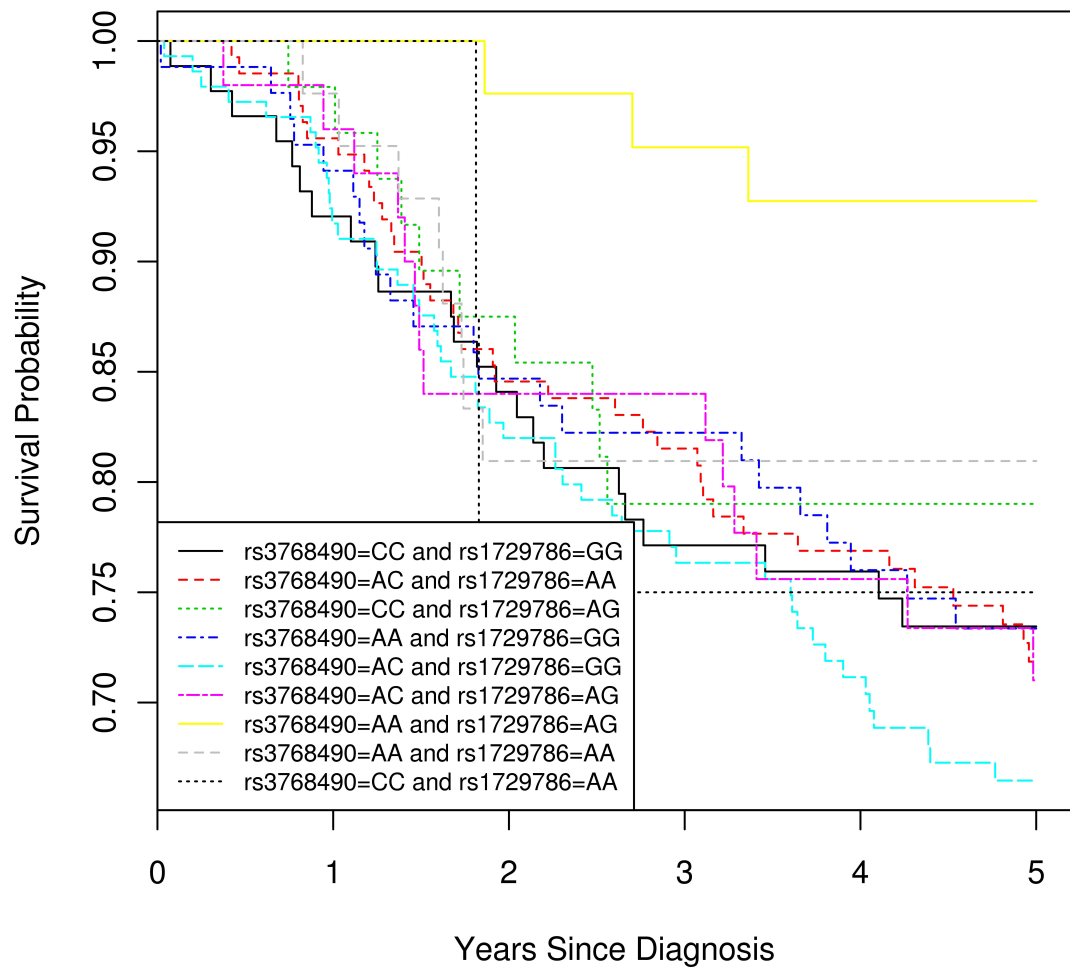

Supplement: NIHMS303100-supplement-3.pdf [file NIHMS303100-supplement-3.pdf]

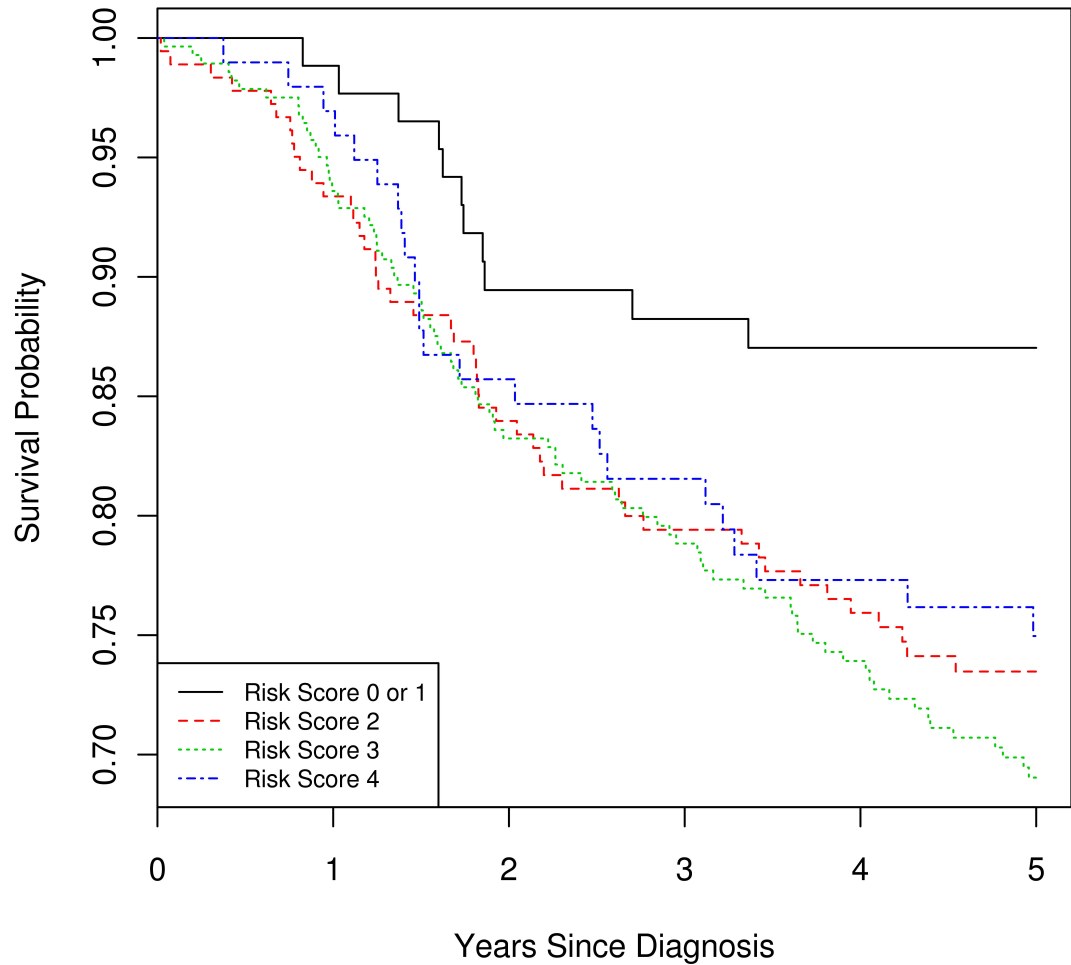

Supplement: NIHMS303100-supplement-4.pdf [file NIHMS303100-supplement-4.pdf]
